# Supplementary material for: Prevalence and clinical impact of malaria infections detected with a highly sensitive HRP2 rapid diagnostic test in Beninese pregnant women
Source: Malar J. 2020 May 24;19:188. doi: 10.1186/s12936-020-03261-1 (PMC7247134; doi:10.1186/s12936-020-03261-1)
Supplement: Supplementary file 2 — Additional file 2. Maternal and birth outcomes, according to type of concomitant malaria infection. RECIPAL, 2014–2017. [file 12936_2020_3261_MOESM2_ESM.docx]

**Additional file 2**. Maternal and birth outcomes, according to type of concomitant malaria infection.

|  | Maternal anaemia | | Maternal Hb level | | Birthweightb | LBWb |
| --- | --- | --- | --- | --- | --- | --- |
|  | In the 1st trimestera  % (n) | In the 3rd trimestera  % (n) | In the 1st trimestera  Mean (CI95%) | In the 3rd trimestera  Mean (CI95%) | Mean (CI95%) | % (n) |
| Malariac |  |  |  |  |  |  |
| Group 1 – No infection | 31.6 (61/193) | 55.9 (109/195) | 11.6 (11.4-11.8) | 10.9 (10.8-11.1) | 3030 (2972-3088) | 6.9 (10/145) |
| Group 2 – qPCR infection | 50.0 (23/46) | 46.1 (6/13) | 11.2 (10.9-11.6) | 11.1 (10.7-11.5) | 3050 (2702-3399) | 0.0 (0/5) |
| Group 3 – uRDT infection | 55.2 (16/29) | 85.7 (6/7) | 10.9 (10.5-11.4) | 10.4 (90.8-11.0) | 2835 (2148-3523) | 25.0 (1/4) |
| Group 4 – cRDT infection | 44.0 (22/50) | 76.9 (20/26) | 11.1 (10.8-11.4) | 10.5 (10.2-10.8) | 3027 (2766-3288) | 14.3 (3/21) |
| Overall | 38.4 (122/318) | 58.5 (141/241) | 11.4 (11.3-11.5) | 11.8 (9.3-14.2) | 3026 (2968-3083) | 8.0 (14/175) |

**a** *Maternal anaemia: Hb level < 11g/dL (as recommended by the WHO for pregnant women) ; Hb level determined in the 1st or 3rd trimester of pregnancy.*

**b** *LBW: low birthweight (<2,500 grams); twins and stillbirths excluded.*

c *Malaria status at the time of 1) Hb level (maternal anaemia) determination in the 1st and 3rd trimesters of pregnancy, and 2) at delivery in peripheral and placental blood for birth outcomes (LBW and birthweight); Groups 1 to 4 defined as described in Table 1.*
