# Supplementary material for: Prevalence and clinical impact of malaria infections detected with a highly sensitive HRP2 rapid diagnostic test in Beninese pregnant women
Source: Malar J. 2020 May 24;19:188. doi: 10.1186/s12936-020-03261-1 (PMC7247134; doi:10.1186/s12936-020-03261-1)
Supplement: Supplementary file 3 — Additional file 3. Association between malaria and maternal and child outcomes (maternal Hb level during pregnancy and birthweight). RECIPAL, 2014–2017. [file 12936_2020_3261_MOESM3_ESM.docx]

**Additional file 3**. Association between malaria and maternal and child outcomes (maternal Hb level during pregnancy and birthweight). RECIPAL, 2014-2017.

|  | Maternal Hb levela | | | Birthweightb | | |
| --- | --- | --- | --- | --- | --- | --- |
|  | aCoeff | 95%CI | Pvalue | aCoeff | 95%CI | Pvalue |
| **Malaria**c |  |  |  |  |  |  |
| Group 1 – No infection | Ref |  |  | Ref |  |  |
| Group 2 – qPCR infection | -0.16 | -0.46 ; 0.14 | 0.29 | 19.9 | -319.9 ; 359.7 | 0.91 |
| Group 3 – uRDT infection | -0.53 | -0.90 ; -0.16 | 0.005 | -209.8 | -589.6 ; 169.9 | 0.28 |
| Group 4 – cRDT infection | -0.43 | -0.69 ; -0.16 | 0.002 | -3.9 | -178.3 ; 170.5 | 0.97 |
| **Gravidity** |  |  |  |  |  |  |
| Primi-secundigravidae | Ref |  |  | Ref |  |  |
| Multigravidae | 0.12 | -0.14 ; 0.37 | 0.37 | 74.0 | -67.6 ; 215.6 | 0.31 |
| **Timing during pregnancy** |  |  |  | - | - | - |
| 1st  trimester | Ref |  |  |  |  |  |
| 3rd trimester | -0.60 | -0.76 ; -0.44 | <10-3 |  |  |  |
| **Ethnicity**d | -0.43 | -0.67 ; -0.19 | <10-3 | - | - | - |
| Constant | 11.77 | 11.47; 12.07 |  | 2971 | 2843; 3099 |  |

a *Hb level (g/dL) determined in the 1st or 3rd trimester. Linear mixed regression model adjusted for gravidity, ethnicity and timing during pregnancy (n=559 observations, 319 women); aCoeff: Adjusted Coefficient.*

b *Birthweight, twins and stillbirths excluded. Linear regression model adjusted for gravidity (n=170).*

c *Malaria status 1) at the time of Hb level determination in the 1st and 3rd trimesters of pregnancy or 2) at delivery based on diagnostic tests positivity in maternal peripheral and placental blood ; Groups 1 to 4 defined as described in Table 1.*

d *Ethnicity: Toffin (considered as the reference) vs. others*
